# Supplementary material
Source: Springer Nature journal article supplement (https://www.springermedizin.de/resource/supplementary/13013_2010_315_MOESM2_ESM.pdf/9631612)

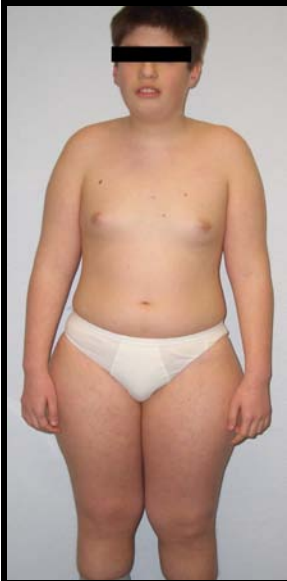

A

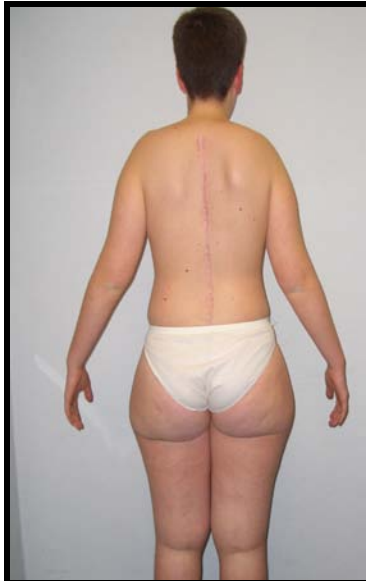

B

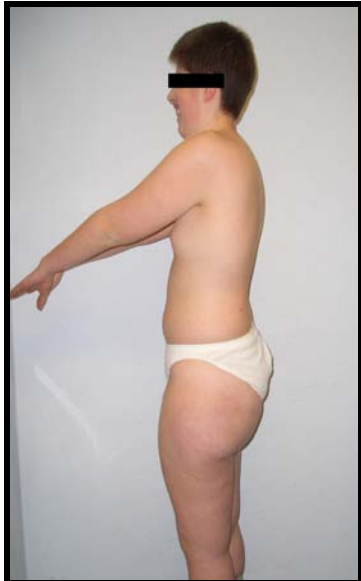

C

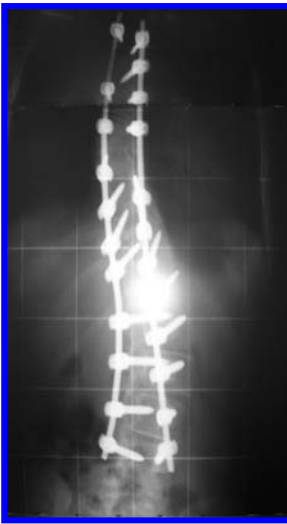

D

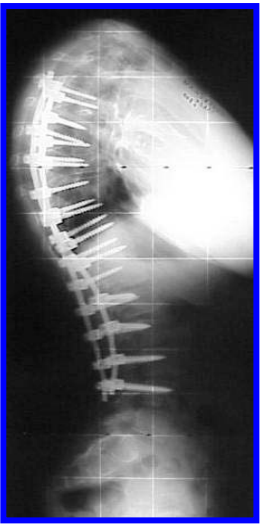

E

Supplement: MOESM2 [file 9631612]
